# Supplementary material for: Second harmonic generation microscopy provides accurate automated staging of liver fibrosis in patients with non-alcoholic fatty liver disease
Source: PubMed Central journal article supplement (PMC6010245; doi:10.1371/journal.pone.0199166), 2018-06-20
Supplement: pone.0199166.s003.pdf [file pone.0199166.s003.pdf]

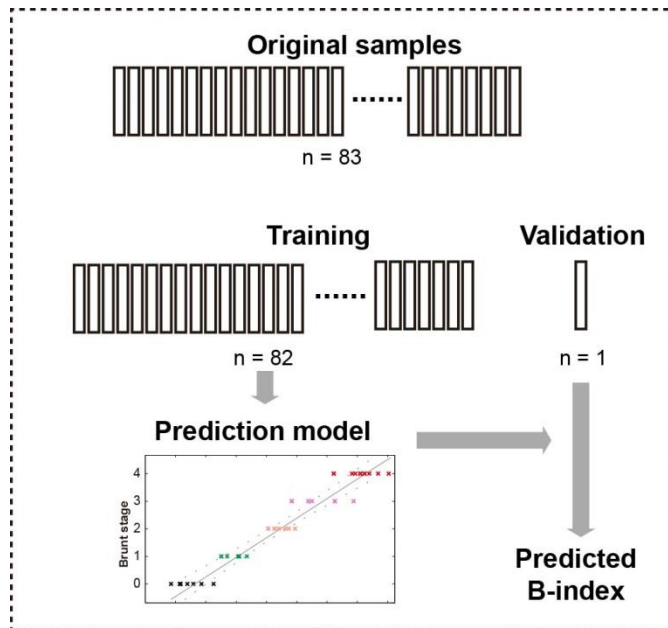

↓ × 83 times  
The one left out is  
different every time

83 predicted B-indices

↓  
Overall Performance
